# Supplementary material for: Microtubule dynamics influence the retrograde biased motility of kinesin-4 motor teams in neuronal dendrites
Source: PubMed Central journal article supplement — Mol Biol Cell. 2022 May 12;33(6):ar52. doi: 10.1091/mbc.E21-10-0480 (PMC9265162; doi:10.1091/mbc.e21-10-0480), 2022-05-12
Supplement: mbc-33-ar52-s002.pdf [file mbc-33-ar52-s002.pdf]

# Microtubule dynamics influence the retrograde biased motility of kinesin-4 motor teams in neuronal dendrites

Erin Masucci, Peter Relich, Melike Melike Lakadamyali, E. Ostap, and Erika Holzbaur

*Corresponding author(s): Erika Holzbaur, University of Pennsylvania*

---

## Review Timeline:

Submission Date:

2021-10-12

Accepted:

2021-10-16

---

*Editor-in-Chief: Matthew Welch*

## Transaction Report:

(Note: With the exception of the correction of typographical or spelling errors that could be a source of ambiguity, letters and reports are not edited. The original formatting of letters and referee reports may not be reflected in this compilation.)

RE: Manuscript #E21-10-0480

TITLE: "Microtubule dynamics influence the retrograde biased motility of kinesin-4 motor teams in neuronal dendrites"

Dear Erica

Thank you for submitting your work to Molecular Biology of the Cell. Because this paper had been previously reviewed at e-Life and that the majority of the concerns were regarding perceived significance rather than the quality of the science, I did not send the paper back out for review. I have read the manuscript, the reviewer critique and your rebuttal. I found the paper to be an exquisite analysis of molecular motor biology, and I am happy to accept it for publication. I noticed a few minor typos/mis-labeling that I indicate below. Please fix these when submitting your final version.

With regards to the publication in the Special Issue on Quantitative Cell Biology, I forwarded my recommended acceptance of your paper to the editors of that issue. They decided it will appear in that collection.

Thank you for submitting your work to Molecular Biology of the Cell.

Claire

Minor Typos:

1. Line 504- letters in Kif21B are transposed
2. I don't think that Figure S1 is a western blot but rather a protein stain. If it is a western- then you need to indicate what antibody is used.
3. Figure S3 legend does not match Figure S3 (which has A, B, C labels)

Sincerely,  
Claire Walczak  
Monitoring Editor  
Molecular Biology of the Cell

-----  
Dear Prof. Holzbaur:

Congratulations on the acceptance of your manuscript.

A PDF of your manuscript will be published on MBoC in Press, an early release version of the journal, within 10 days. The date your manuscript appears at [www.molbiolcell.org/toc/mboc/0/0](http://www.molbiolcell.org/toc/mboc/0/0) is the official publication date. Your manuscript will also be scheduled for publication in the next available issue of MBoC.

Within approximately four weeks you will receive a PDF page proof of your article.

Would you like to see an image related to your accepted manuscript on the cover of MBoC? Please contact the MBoC Editorial Office at [mboc@ascb.org](mailto:mboc@ascb.org) to learn how to submit an image.

Authors of Articles and Brief Communications are encouraged to create a short video abstract to accompany their article when it is published. These video abstracts, known as Science Sketches, are up to 2 minutes long and will be published on YouTube and then embedded in the article abstract. Science Sketch Editors on the MBoC Editorial Board will provide guidance as you prepare your video. Information about how to prepare and submit a video abstract is available at [www.molbiolcell.org/science-sketches](http://www.molbiolcell.org/science-sketches). Please contact [mboc@ascb.org](mailto:mboc@ascb.org) if you are interested in creating a Science Sketch.

We are pleased that you chose to publish your work in MBoC.

Sincerely,

Eric Baker  
Journal Production Manager  
MBoC Editorial Office  
[mbc@ascb.org](mailto:mbc@ascb.org)

-----



RE: Manuscript #E21-10-0480

TITLE: "Microtubule dynamics influence the retrograde biased motility of kinesin-4 motor teams in neuronal dendrites"

Dear Erica

Thank you for submitting your work to Molecular Biology of the Cell. Because this paper had been previously reviewed at e-Life and that the majority of the concerns were regarding perceived significance rather than the quality of the science, I did not send the paper back out for review. I have read the manuscript, the reviewer critique and your rebuttal. I found the paper to be an exquisite analysis of molecular motor biology, and I am happy to accept it for publication. I noticed a few minor typos/mis-labeling that I indicate below. Please fix these when submitting your final version.

With regards to the publication in the Special Issue on Quantitative Cell Biology, I forwarded my recommended acceptance of your paper to the editors of that issue. They decided it will appear in that collection.

Thank you for submitting your work to Molecular Biology of the Cell.

Claire

Minor Typos:

1. Line 504- letters in Kif21B are transposed
2. I don't think that Figure S1 is a western blot but rather a protein stain. If it is a western- then you need to indicate what antibody is used.
3. Figure S3 legend does not match Figure S3 (which has A, B, C labels)

Sincerely,  
Claire Walczak  
Monitoring Editor  
Molecular Biology of the Cell

-----  
Dear Prof. Holzbaur:

Congratulations on the acceptance of your manuscript.

A PDF of your manuscript will be published on MBoC in Press, an early release version of the journal, within 10 days. The date your manuscript appears at [www.molbiolcell.org/toc/mboc/0/0](http://www.molbiolcell.org/toc/mboc/0/0) is the official publication date. Your manuscript will also be scheduled for publication in the next available issue of MBoC.

Within approximately four weeks you will receive a PDF page proof of your article.

Would you like to see an image related to your accepted manuscript on the cover of MBoC? Please contact the MBoC Editorial Office at [mboc@ascb.org](mailto:mboc@ascb.org) to learn how to submit an image.

Authors of Articles and Brief Communications are encouraged to create a short video abstract to accompany their article when it is published. These video abstracts, known as Science Sketches, are up to 2 minutes long and will be published on YouTube and then embedded in the article abstract. Science Sketch Editors on the MBoC Editorial Board will provide guidance as you prepare your video. Information about how to prepare and submit a video abstract is available at [www.molbiolcell.org/science-sketches](http://www.molbiolcell.org/science-sketches). Please contact [mboc@ascb.org](mailto:mboc@ascb.org) if you are interested in creating a Science Sketch.

We are pleased that you chose to publish your work in MBoC.

Sincerely,

Eric Baker  
Journal Production Manager  
MBoC Editorial Office  
[mbc@ascb.org](mailto:mbc@ascb.org)

---
